# Supplementary material
Source: MDPI journal article supplement (https://www.mdpi.com/2227-9040/11/10/512)

Supplementary Figure S1

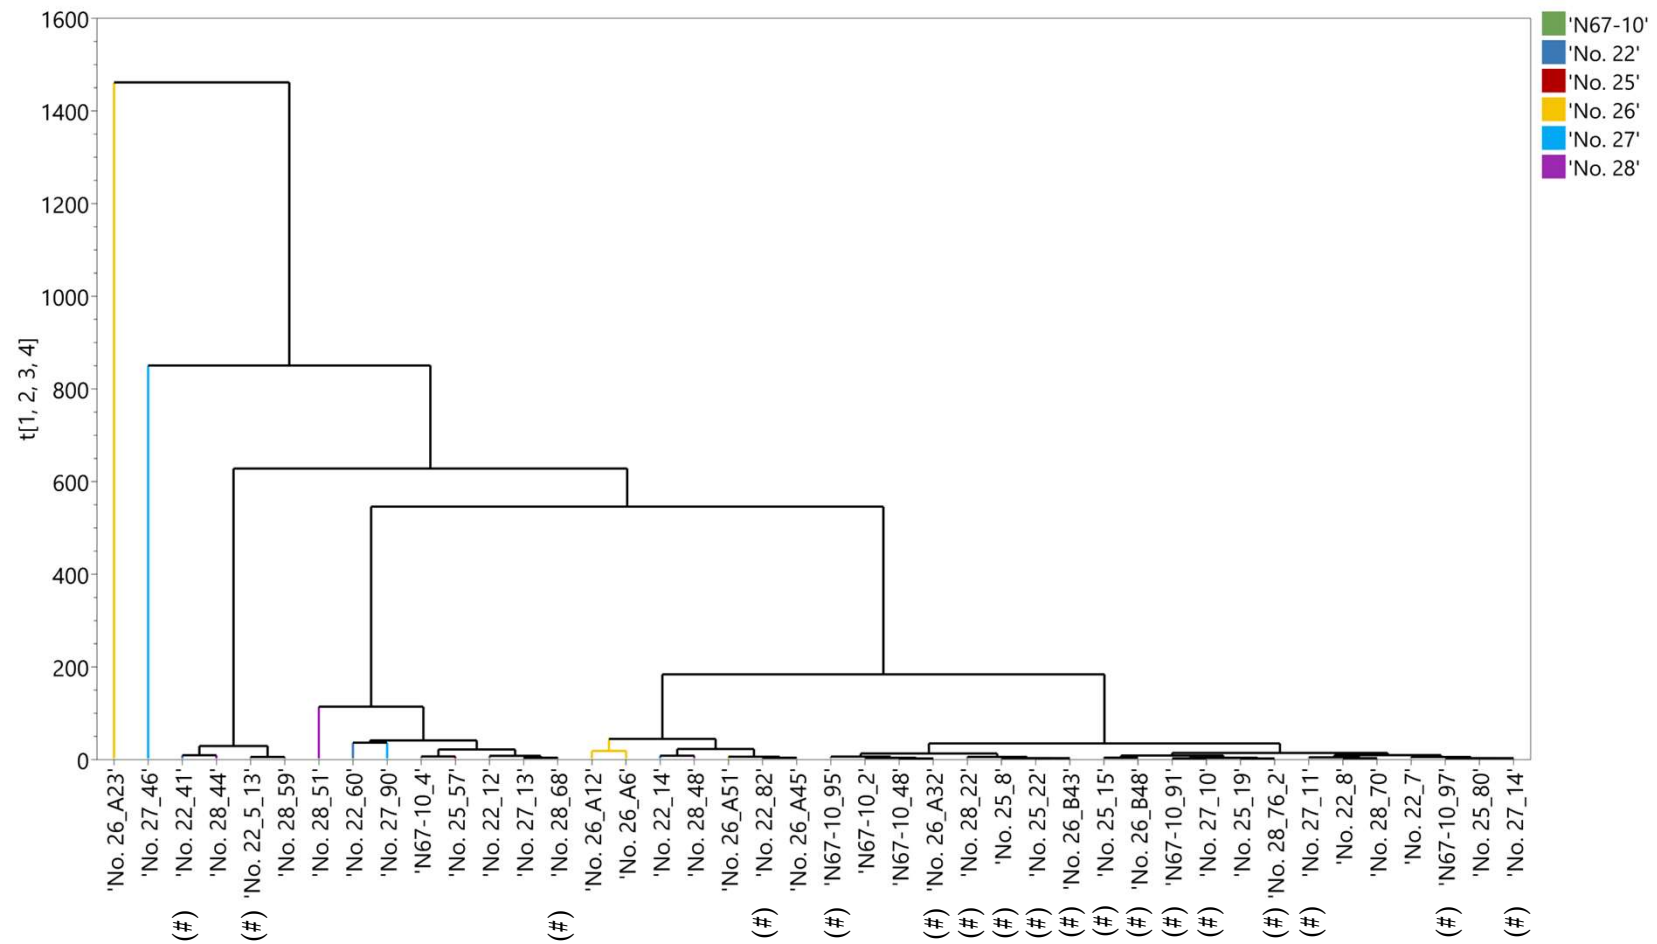

Supplement: s1 [file s1]

Supplementary Figure S2

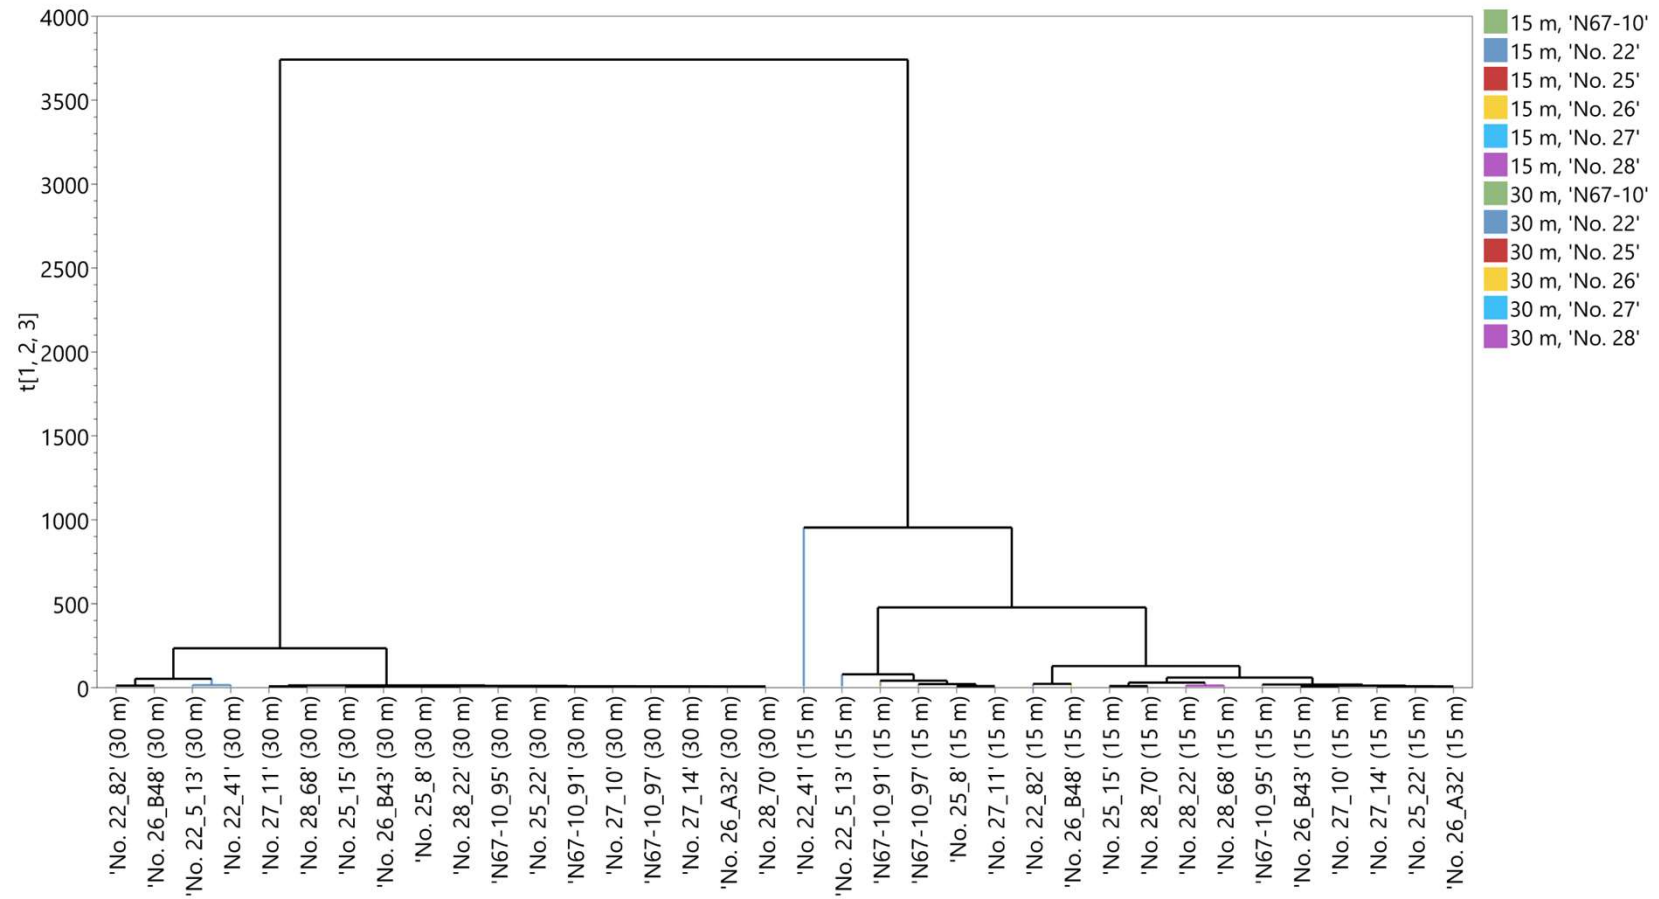

Supplement: s1 [file s1]
